# Supplementary material for: Success Factors for Humanitarian Access: Quantitative Case Studies of ICRC Visits to Detainees
Source: Frontiers journal article supplement (doi:10.3389/fpos.2022.928713), 2022-08-04
Supplement: Data_Sheet_1.docx [file Data_Sheet_1.docx]

**Online Appendix**

1. **Logit Regression**

All models employ the logit regression with corresponding variables. In each model, is the probability of a government *i* grants ICRC access to detention centers in year of *j*, in other words ICRC’s accessibility to detainees. is a vector including variable that each model orders. is a coefficient vector. is a intercept common for all country – year dyads.

1. **The number of cases in original revised datasets**

| Analysis I | Original | | Revised | |
| --- | --- | --- | --- | --- |
| Value | Frequency | Ratio | Frequency | Ratio |
| Access | 779 | 15% | 877 | 69% |
| No Access | 192 | 61% | 259 | 20% |
| Missing | 307 | 24% | 0 | 0% |
| Excluded | 0 | 0% | 142 | 11% |
| Total | 1278 | 100% | 1278 | 100% |

| Analysis II | Original | | Revised | |
| --- | --- | --- | --- | --- |
| Value | Frequency | Ratio | Frequency | Ratio |
| Access | 66 | 16% | 66 | 16% |
| No Access | 237 | 56% | 358 | 84% |
| Missing | 121 | 28% | 0 | 0% |
| Total | 424 | 100% | 424 | 100% |

1. **Omitted Countries**

- for incomplete data of independent variables
  - Malta, Cyprus
- for non-governmentality
  - Detention by supervision of international courts of ICTY ICTR;
  - Palestine, Kosovo, Occupation Forces in Afghanistan and Iraq
- for not being referred of detainees in ICRC’s annual reports
  - Andorra, Antigua and Barbuda, Bahamas, Barbados, Belize, Brunei, Bulgaria, Cook Islands, Costa Rica, Czech Republic, Dominica, Dominican Republic, North Korea, Ghana, Guyana, Holy See, Iceland, Ireland, Kiribati, Latvia, Liechtenstein, Lithuania, Luxembourg, Marshall Islands, Mauritius, Micronesia, Monaco, Mozambique, Netherlands, New Zealand, Nicaragua, Oman, Palau, Panama, Portugal, Romania, St. Kitts and Nevis, St. Lucia, St. Vincent and the Grenadines, Samoa, San Marino, Sao Tome and Principle, Singapore, Slovakia, Slovenia, Suriname Switzerland, Tonga, Trinidad and Tobago, Tuvalu, UAE
